# Supplementary material for: Assessment of DNA damage by 53PB1 and pKu70 detection in peripheral blood lymphocytes by immunofluorescence and high-resolution transmission electron microscopy
Source: Springer Nature journal article supplement (doi:10.1007/s00066-020-01576-1), 2020-01-31
Supplement: MOESM3 [file 17613572]

| Tumor entity                 | 53BP1-yield, foci per cell |      |      |      |      |      |      |      |      |
|------------------------------|----------------------------|------|------|------|------|------|------|------|------|
|                              | 0                          | 1    | 2    | 3    | 4    | 5    | 6    | 7    | ≥8   |
| <b>Head&amp;neck cancer</b>  |                            |      |      |      |      |      |      |      |      |
| no. of cells                 |                            |      |      |      |      |      |      |      |      |
| <b>Observed distribution</b> |                            |      |      |      |      |      |      |      |      |
| Mean                         | 39                         | 60   | 61   | 91   | 55   | 52   | 26   | 21   | 27   |
| ± SD                         | 1.38                       | 1.45 | 1.83 | 2.83 | 2.31 | 1.76 | 1.62 | 1.46 | 1.64 |
| Patient 1                    | 38                         | 55   | 65   | 99   | 49   | 45   | 21   | 14   | 26   |
| <i>in-vivo</i>               | 31                         | 59   | 61   | 97   | 55   | 50   | 27   | 20   | 24   |
|                              | 42                         | 60   | 59   | 107  | 59   | 49   | 32   | 12   | 19   |
| Patient 2                    | 44                         | 67   | 67   | 90   | 57   | 53   | 25   | 24   | 29   |
| <i>in-vivo</i>               | 48                         | 59   | 69   | 99   | 66   | 59   | 22   | 20   | 35   |
|                              | 39                         | 63   | 60   | 87   | 61   | 63   | 30   | 17   | 38   |
| Patient 3                    | 33                         | 51   | 51   | 103  | 55   | 60   | 35   | 22   | 24   |
| <i>in-vivo</i>               | 35                         | 60   | 68   | 96   | 67   | 52   | 30   | 25   | 18   |
|                              | 41                         | 68   | 70   | 84   | 62   | 56   | 28   | 18   | 30   |
| Patient 4                    | 44                         | 52   | 52   | 81   | 43   | 49   | 17   | 26   | 24   |
| <i>in-vivo</i>               | 41                         | 63   | 54   | 79   | 48   | 47   | 16   | 29   | 31   |
|                              | 36                         | 61   | 60   | 75   | 42   | 42   | 24   | 27   | 28   |
| <b>Poisson distribution</b>  |                            |      |      |      |      |      |      |      |      |
| Mean                         | 14                         | 48   | 82   | 94   | 80   | 56   | 32   | 16   | 4    |
| ± SD                         | 1.23                       | 1.36 | 1.24 | 1.45 | 1.53 | 0.87 | 1.08 | 1.07 | 0.34 |
| Donor 1                      | 21                         | 56   | 56   | 99   | 75   | 59   | 28   | 10   | 4    |
| <i>ex-vivo</i>               | 14                         | 50   | 50   | 92   | 71   | 61   | 33   | 13   | 3    |
|                              | 16                         | 51   | 51   | 98   | 78   | 53   | 30   | 14   | 5    |
| Donor 2                      | 9                          | 43   | 43   | 86   | 85   | 56   | 35   | 20   | 4    |
| <i>ex-vivo</i>               | 11                         | 38   | 38   | 89   | 90   | 55   | 36   | 21   | 2    |
|                              | 15                         | 46   | 46   | 92   | 83   | 51   | 39   | 17   | 3    |
| Donor 3                      | 10                         | 42   | 42   | 94   | 77   | 58   | 32   | 11   | 5    |
| <i>ex-vivo</i>               | 12                         | 49   | 49   | 90   | 80   | 57   | 29   | 15   | 5    |
|                              | 8                          | 50   | 50   | 91   | 72   | 59   | 34   | 18   | 2    |
| Donor 4                      | 18                         | 49   | 49   | 105  | 84   | 52   | 28   | 16   | 5    |
| <i>ex-vivo</i>               | 22                         | 46   | 46   | 93   | 81   | 55   | 26   | 22   | 2    |
|                              | 15                         | 52   | 52   | 98   | 82   | 53   | 29   | 19   | 3    |
| <b>Rectal cancer</b>         |                            |      |      |      |      |      |      |      |      |
| no. of cells                 |                            |      |      |      |      |      |      |      |      |
| <b>Observed distribution</b> |                            |      |      |      |      |      |      |      |      |
| Mean                         | 50                         | 66   | 103  | 100  | 81   | 47   | 32   | 17   | 21   |
| ± SD                         | 0.92                       | 1.15 | 1.51 | 1.45 | 1.37 | 1.01 | 1.14 | 0.86 | 0.89 |
| Patient 1                    | 47                         | 60   | 114  | 89   | 77   | 53   | 35   | 19   | 13   |
| <i>in-vivo</i>               | 49                         | 65   | 113  | 99   | 75   | 50   | 36   | 15   | 19   |
|                              | 51                         | 67   | 109  | 93   | 84   | 47   | 30   | 14   | 25   |
| Patient 2                    | 53                         | 70   | 105  | 103  | 80   | 41   | 32   | 23   | 17   |
| <i>in-vivo</i>               | 58                         | 69   | 97   | 100  | 82   | 49   | 25   | 20   | 27   |
|                              | 55                         | 62   | 101  | 99   | 88   | 50   | 26   | 19   | 20   |
| Patient 3                    | 50                         | 58   | 102  | 110  | 75   | 45   | 29   | 11   | 21   |
| <i>in-vivo</i>               | 49                         | 61   | 96   | 105  | 71   | 44   | 31   | 13   | 24   |
|                              | 53                         | 65   | 99   | 100  | 79   | 40   | 26   | 16   | 17   |
| Patient 4                    | 50                         | 60   | 100  | 98   | 80   | 49   | 34   | 17   | 15   |
| <i>in-vivo</i>               | 51                         | 67   | 104  | 101  | 86   | 50   | 32   | 21   | 20   |
|                              | 51                         | 68   | 94   | 95   | 89   | 47   | 36   | 22   | 19   |

|                             |      |      |      |      |      |      |      |      |      |
|-----------------------------|------|------|------|------|------|------|------|------|------|
| Patient 5<br><i>in-vivo</i> | 47   | 70   | 102  | 104  | 90   | 41   | 37   | 15   | 24   |
|                             | 42   | 74   | 110  | 111  | 81   | 42   | 40   | 16   | 22   |
|                             | 50   | 69   | 105  | 99   | 79   | 49   | 37   | 19   | 26   |
| <b>Poisson distribution</b> |      |      |      |      |      |      |      |      |      |
| Mean                        | 22   | 68   | 108  | 114  | 92   | 58   | 32   | 14   | 8    |
| ± SD                        | 0.82 | 1.19 | 1.35 | 1.21 | 0.89 | 0.81 | 0.69 | 0.86 | 0.51 |
| Donor 1<br><i>ex-vivo</i>   | 19   | 77   | 111  | 115  | 90   | 60   | 32   | 15   | 9    |
|                             | 20   | 72   | 112  | 118  | 94   | 55   | 29   | 10   | 8    |
|                             | 25   | 70   | 107  | 114  | 92   | 57   | 30   | 9    | 5    |
| Donor 2<br><i>ex-vivo</i>   | 23   | 68   | 113  | 110  | 89   | 58   | 27   | 16   | 8    |
|                             | 19   | 62   | 100  | 116  | 92   | 62   | 33   | 19   | 7    |
|                             | 15   | 61   | 109  | 117  | 95   | 61   | 35   | 14   | 5    |
| Donor 3<br><i>ex-vivo</i>   | 22   | 69   | 108  | 119  | 93   | 60   | 29   | 21   | 8    |
|                             | 24   | 73   | 99   | 107  | 97   | 55   | 33   | 18   | 4    |
|                             | 20   | 74   | 114  | 108  | 90   | 54   | 30   | 16   | 10   |
| Donor 4<br><i>ex-vivo</i>   | 17   | 66   | 101  | 107  | 91   | 60   | 34   | 15   | 11   |
|                             | 25   | 63   | 110  | 110  | 99   | 62   | 36   | 16   | 8    |
|                             | 26   | 62   | 103  | 113  | 98   | 64   | 30   | 12   | 9    |
| Donor 5<br><i>ex-vivo</i>   | 25   | 69   | 112  | 119  | 87   | 58   | 28   | 12   | 7    |
|                             | 20   | 66   | 115  | 120  | 89   | 53   | 35   | 10   | 6    |
|                             | 23   | 67   | 102  | 121  | 90   | 57   | 31   | 13   | 10   |
