# Supplementary material for: Assessment of DNA damage by 53PB1 and pKu70 detection in peripheral blood lymphocytes by immunofluorescence and high-resolution transmission electron microscopy
Source: Springer Nature journal article supplement (doi:10.1007/s00066-020-01576-1), 2020-01-31
Supplement: MOESM4 [file 17613572]

**3C**                      **Induction**  
[53BP1-foci/cell]

| <b>Dose</b><br><b>[Gy]</b> |               |
|----------------------------|---------------|
| 0.5                        | 2.82 ± 0.016  |
| 1.0                        | 7.69 ± 0.772  |
| 2.0                        | 13.66 ± 0.155 |
| 4.0                        | 15.60 ± 0.709 |

The unirradiated control (0.67±0.080) was subtracted

**3D**                      **Repair**  
[53BP1-foci/cell]

| <b>Time point</b><br><b>after RT [h]</b> |              |
|------------------------------------------|--------------|
| 0.5                                      | 8.88 ± 0.456 |
| 2.5                                      | 3.77 ± 0.201 |
| 8.0                                      | 2.69 ± 0.123 |
| 24.0                                     | 0.61 ± 0.038 |

The unirradiated control (0.61 ± 0.014) was subtracted
