# Supplementary material for: Assessment of DNA damage by 53PB1 and pKu70 detection in peripheral blood lymphocytes by immunofluorescence and high-resolution transmission electron microscopy
Source: Springer Nature journal article supplement (doi:10.1007/s00066-020-01576-1), 2020-01-31
Supplement: MOESM5 [file 17613572]

| <b>A</b>                   | <b>RCT patient</b>                 | <b>RT patient</b>                  |
|----------------------------|------------------------------------|------------------------------------|
|                            | [pKu70-dimers/ $\mu\text{m}^3$ ]   | [pKu70-dimers/ $\mu\text{m}^3$ ]   |
| <b>Time point after RT</b> |                                    |                                    |
| <b>Chromatin (total)</b>   |                                    |                                    |
| non-IR                     | 0.11 $\pm$ 0.008                   | 0.15 $\pm$ 0.014                   |
| 0.1h                       | 1.76 $\pm$ 0.035                   | 1.75 $\pm$ 0.031                   |
| 0.5h                       | 2.09 $\pm$ 0.023                   | 1.87 $\pm$ 0.025                   |
| 24h                        | 0.41 $\pm$ 0.014                   | 0.24 $\pm$ 0.021                   |
| <b>Euchromatin</b>         |                                    |                                    |
| non-IR                     | 0.05 $\pm$ 0.007                   | 0.06 $\pm$ 0.005                   |
| 0.1h                       | 1.53 $\pm$ 0.023                   | 1.53 $\pm$ 0.030                   |
| 0.5h                       | 0.62 $\pm$ 0.016                   | 0.49 $\pm$ 0.023                   |
| 24h                        | 0.18 $\pm$ 0.007                   | 0.07 $\pm$ 0.012                   |
| <b>Heterochromatin</b>     |                                    |                                    |
| non-IR                     | 0.06 $\pm$ 0.002                   | 0.09 $\pm$ 0.013                   |
| 0.1h                       | 0.21 $\pm$ 0.024                   | 0.22 $\pm$ 0.009                   |
| 0.5h                       | 1.47 $\pm$ 0.026                   | 1.38 $\pm$ 0.011                   |
| 24h                        | 0.23 $\pm$ 0.013                   | 0.23 $\pm$ 0.013                   |
| <b>B</b>                   | <b>RCT patient</b>                 | <b>RT patient</b>                  |
|                            | [53BP1-clusters/ $\mu\text{m}^3$ ] | [53BP1-clusters/ $\mu\text{m}^3$ ] |
| <b>Time point after RT</b> |                                    |                                    |
| <b>Heterochromatin</b>     |                                    |                                    |
| non-IR                     | 0.06 $\pm$ 0.004                   | 0.09 $\pm$ 0.008                   |
| 0.1h                       | 0.21 $\pm$ 0.013                   | 0.22 $\pm$ 0.011                   |
| 0.5h                       | 1.51 $\pm$ 0.046                   | 1.43 $\pm$ 0.019                   |
| 24h                        | 0.50 $\pm$ 0.031                   | 0.31 $\pm$ 0.013                   |
